# Supplementary material for: Effectiveness of onabotulinumtoxinA (BOTOX®) for the preventive treatment of chronic migraine: A meta-analysis on 10 years of real-world data
Source: PubMed Central journal article supplement — Cephalalgia. 2022 Sep 8;42(14):1543–64. doi: 10.1177/03331024221123058 (PMC9693763; doi:10.1177/03331024221123058), 2022-09-08

**SUPPLEMENTARY MATERIALS**

**Supplementary Table 1A. Population, Intervention, Comparator, Outcomes, and Setting/Study Design.**

|                     | <b>INCLUSION CRITERIA</b>                                                                                                                                                                                                                                                                                                                                                                                                                                                                                                                           |
|---------------------|-----------------------------------------------------------------------------------------------------------------------------------------------------------------------------------------------------------------------------------------------------------------------------------------------------------------------------------------------------------------------------------------------------------------------------------------------------------------------------------------------------------------------------------------------------|
| <b>POPULATION</b>   | Adult patients with chronic and unspecified migraine                                                                                                                                                                                                                                                                                                                                                                                                                                                                                                |
| <b>INTERVENTION</b> | OnabotulinumtoxinA (Botox)                                                                                                                                                                                                                                                                                                                                                                                                                                                                                                                          |
| <b>COMPARATORS</b>  | <ul style="list-style-type: none"> <li>• Eptinezumab</li> <li>• Fremanezumab</li> <li>• Galcanezumab</li> <li>• Erenumab</li> <li>• Amitriptyline</li> <li>• Nortriptyline</li> <li>• Doxepin</li> <li>• Atenolol</li> <li>• Propranolol</li> <li>• Nadolol</li> <li>• Metoprolol Timolol</li> <li>• Gabapentin</li> <li>• Topiramate</li> <li>• Flunarizine</li> <li>• Divalproex sodium</li> <li>• Valproate sodium</li> <li>• Valproic acid</li> <li>• Candesartan</li> <li>• Pizotyline</li> <li>• Venlafaxine</li> <li>• Duloxetine</li> </ul> |

|                        |                                                                                                                                                                                                                                                                                                                                                                                                                                                                                                                                                                                                                                                                                                                                                                                                                          |                                                                                                                                                                                                                                                                                                                                                                                                                                                                                                                                                                                                                                                                                                                                                                                                                                                                                                                                                                                        |
|------------------------|--------------------------------------------------------------------------------------------------------------------------------------------------------------------------------------------------------------------------------------------------------------------------------------------------------------------------------------------------------------------------------------------------------------------------------------------------------------------------------------------------------------------------------------------------------------------------------------------------------------------------------------------------------------------------------------------------------------------------------------------------------------------------------------------------------------------------|----------------------------------------------------------------------------------------------------------------------------------------------------------------------------------------------------------------------------------------------------------------------------------------------------------------------------------------------------------------------------------------------------------------------------------------------------------------------------------------------------------------------------------------------------------------------------------------------------------------------------------------------------------------------------------------------------------------------------------------------------------------------------------------------------------------------------------------------------------------------------------------------------------------------------------------------------------------------------------------|
| <p><b>OUTCOMES</b></p> | <p><b>Effectiveness outcomes</b></p> <ul style="list-style-type: none"> <li>• Response rates (headache days, as per various definitions and time points)</li> <li>• ≥30% reduction in headache days</li> <li>• ≥50% reduction in headache days</li> <li>• ≥75% reduction in headache days</li> <li>• ≥2-fold increase in headache-free days</li> <li>• Response rates (migraine days, as per various definitions and time points)</li> <li>• ≥30% reduction in migraine days</li> <li>• ≥50% reduction in migraine days</li> <li>• ≥75% reduction in migraine days</li> <li>• Monthly migraine days (MMD) (including change in migraine days from baseline)</li> <li>• Monthly headache days (MHD) (including change in headache days from baseline)</li> <li>• Frequency of moderate or severe headache days</li> </ul> | <ul style="list-style-type: none"> <li>• Health utility (EuroQol 5 Dimensions [EQ-5D], Short Form-12 [SF-12], SF-36)</li> <li>• Comorbid anxiety or depression as per various scales (e.g. Patient Health Questionnaire-9 [PHQ-9], General Anxiety Disorder-7 [GAD-7], Hospital Anxiety and Depression Scale [HADS], Beck Depression Inventory [BDI])</li> <li>• Sleep quality</li> <li>• Change in concomitant preventive medication use</li> <li>• Change in concomitant acute medication use from baseline (e.g. monthly acute medication days/month)</li> <li>• Concomitant non-opioid analgesic use</li> <li>• Concomitant opioid use</li> <li>• Adherence (as assessed at various time points)</li> <li>• Persistence (as assessed at various time points)</li> <li>• Patient satisfaction with treatment</li> </ul> <p><b>Safety outcomes</b></p> <ul style="list-style-type: none"> <li>• Any TEAEs</li> <li>• Any serious TEAEs</li> <li>• Treatment-related TEAEs</li> </ul> |
|------------------------|--------------------------------------------------------------------------------------------------------------------------------------------------------------------------------------------------------------------------------------------------------------------------------------------------------------------------------------------------------------------------------------------------------------------------------------------------------------------------------------------------------------------------------------------------------------------------------------------------------------------------------------------------------------------------------------------------------------------------------------------------------------------------------------------------------------------------|----------------------------------------------------------------------------------------------------------------------------------------------------------------------------------------------------------------------------------------------------------------------------------------------------------------------------------------------------------------------------------------------------------------------------------------------------------------------------------------------------------------------------------------------------------------------------------------------------------------------------------------------------------------------------------------------------------------------------------------------------------------------------------------------------------------------------------------------------------------------------------------------------------------------------------------------------------------------------------------|

|                     |                                                                                                                                                                                                                                                                                                                                                                                                                                                                                                                                                                                                                                                                                                                                                                                                                                                                                   |
|---------------------|-----------------------------------------------------------------------------------------------------------------------------------------------------------------------------------------------------------------------------------------------------------------------------------------------------------------------------------------------------------------------------------------------------------------------------------------------------------------------------------------------------------------------------------------------------------------------------------------------------------------------------------------------------------------------------------------------------------------------------------------------------------------------------------------------------------------------------------------------------------------------------------|
|                     | <ul style="list-style-type: none"> <li>• Headache or migraine severity/intensity<sup>&amp;</sup></li> <li>• Headache or migraine duration</li> <li>• Headache impact test-6 (HIT-6)</li> <li>• Migraine-Specific Quality of Life (MSQ) score</li> <li>• Migraine Disability Assessment (MIDAS) score</li> </ul> <ul style="list-style-type: none"> <li>• Common TEAEs (TEAEs occurring in &gt;2% of patients).</li> </ul> <p><b>Tolerability outcomes</b></p> <ul style="list-style-type: none"> <li>• Withdrawals/discontinuations due to any reason</li> <li>• Withdrawals/discontinuations due to TEAEs</li> <li>• Withdrawals/discontinuations due to lack of effectiveness</li> <li>• Withdrawals/discontinuations due to lost to follow-up</li> <li>• Withdrawals/discontinuations due to death</li> <li>• Withdrawals/discontinuations due to any other reasons</li> </ul> |
| <b>STUDY DESIGN</b> | <p>Studies identified between January 1, 2010 and January 30, 2021, assessing any pharmacologic agents (with or without a comparator group) for the preventive treatment of chronic migraine; observational study designs (excluding case reports, case series and Phase 4 non-randomized controlled trials); sample size ≥40 and follow-up period reported</p>                                                                                                                                                                                                                                                                                                                                                                                                                                                                                                                   |

<sup>&</sup>In most studies, headache severity was assessed using a numeric scale or VAS or pain intensity score. In some study abstracts, this may not have been defined.

TEAE: treatment-emergent adverse event; VAS: visual analog scale.

**Supplementary Table 1B. Search strategy.**

| <b>Search strategy for Embase/Medline (using embase.com conducted on 11<sup>th</sup> Feb 2020.</b> |                                                                                                                                                                                                                                                                                                                                                            |                |                           |
|----------------------------------------------------------------------------------------------------|------------------------------------------------------------------------------------------------------------------------------------------------------------------------------------------------------------------------------------------------------------------------------------------------------------------------------------------------------------|----------------|---------------------------|
| <b>No.</b>                                                                                         | <b>Query</b>                                                                                                                                                                                                                                                                                                                                               | <b>Results</b> | <b>Facet</b>              |
| 1                                                                                                  | 'migraine'/exp                                                                                                                                                                                                                                                                                                                                             | 64,515         | <b>Disease facet</b>      |
| 2                                                                                                  | 'migraine':ab,ti OR 'migrainous headache':ab,ti OR<br>'hemicrania':ab,ti OR 'status hemicranicus':ab,ti OR<br>'chronic migraine':ab,ti                                                                                                                                                                                                                     | 51,823         |                           |
| 3                                                                                                  | #1 OR #2                                                                                                                                                                                                                                                                                                                                                   | 70,396         |                           |
| 4                                                                                                  | 'observational study'/exp OR 'survey'/exp<br>OR 'electronic health record'/exp OR 'medical record<br>review'/exp OR 'pragmatic trial'/exp OR 'real world<br>data'/exp OR 'real world evidence'/exp OR 'clinical<br>practice'/exp OR 'cross-sectional study'/exp<br>OR 'registry'/exp OR 'register':ab,ti<br>OR 'registries':ab,ti OR 'cohort analysis'/exp | 4,187,180      | <b>Study design facet</b> |

|   |                                                                                                                                                                                                                                                                                                                                                                              |               |              |
|---|------------------------------------------------------------------------------------------------------------------------------------------------------------------------------------------------------------------------------------------------------------------------------------------------------------------------------------------------------------------------------|---------------|--------------|
|   | OR 'longitudinal study'/exp OR 'prospective study'/exp OR 'follow up'/exp OR 'case control study'/exp OR ((case* NEXT/1 control*):ti,ab) OR cohort*:ab,ti OR (((('follow up' OR followup) NEXT/1 (study OR studies)):ab,ti) OR 'retrospective study'/exp                                                                                                                     |               |              |
| 5 | observational:ab,ti OR 'observational study':ab,ti OR survey:ab,ti OR database:ab,ti OR 'insurance claim':ab,ti OR 'electronic health record':ab,ti OR 'electronic medical record':ab,ti OR 'chart review':ab,ti OR 'cross sectional':ab,ti OR 'pragmatic trial':ab,ti OR 'real world':ab,ti OR 'real life':ab,ti OR 'non-interventional':ab,ti OR 'clinical practice':ab,ti | 2,025,089     |              |
| 6 | (#4 OR #5) NOT ([editorial]/lim OR [letter]/lim OR [note]/lim)                                                                                                                                                                                                                                                                                                               | 5,040,598     |              |
| 7 | #3 AND #6                                                                                                                                                                                                                                                                                                                                                                    | 16,302        |              |
| 8 | <b>#3 AND #6 AND [2010-2020]/py</b>                                                                                                                                                                                                                                                                                                                                          | <b>12,269</b> | <b>Final</b> |

| <b>Search strategy for Cochrane library conducted on 6<sup>th</sup> Mar 2020.</b> |                                                                                                                                       |                |                           |
|-----------------------------------------------------------------------------------|---------------------------------------------------------------------------------------------------------------------------------------|----------------|---------------------------|
| <b>No.</b>                                                                        | <b>Query</b>                                                                                                                          | <b>Results</b> | <b>Facet</b>              |
| 1                                                                                 | MeSH descriptor: [Migraine Disorders] explode all trees                                                                               | 2548           | <b>Disease facet</b>      |
| 2                                                                                 | ('migraine':ab,ti OR 'migrainous headache':ab,ti OR 'hemicrania':ab,ti OR 'status hemicranicus':ab,ti OR 'chronic migraine'):ti,ab,kw | 6405           |                           |
| 3                                                                                 | #1 OR #2                                                                                                                              | 6510           |                           |
| 4                                                                                 | (Observational study OR cross-sectional OR cohort study OR case-control study):ti,ab,kw                                               | 75311          | <b>Study design facet</b> |
| 5                                                                                 | (prospective study Or retrospective study OR registry OR longitudinal study):ti,ab,kw                                                 | 213102         |                           |
| 6                                                                                 | (survey OR electronic medical record OR chart review OR real world data):ti,ab,kw                                                     | 32946          |                           |
| 7                                                                                 | #4 OR #5 OR #6                                                                                                                        | 284863         |                           |

|                                                                                                                   |                                                                                                                                                                                                                                                                                                                                                                            |                |                           |
|-------------------------------------------------------------------------------------------------------------------|----------------------------------------------------------------------------------------------------------------------------------------------------------------------------------------------------------------------------------------------------------------------------------------------------------------------------------------------------------------------------|----------------|---------------------------|
| 8                                                                                                                 | #3 AND #7                                                                                                                                                                                                                                                                                                                                                                  | 865            |                           |
| 9                                                                                                                 | #8 with Cochrane Library publication date from Jan 2010 to Mar 2020, in Cochrane Reviews and Trials                                                                                                                                                                                                                                                                        | 393            | <b>Final</b>              |
| <b>Search strategy for updated Embase/Medline search(using embase.com) conducted on 20<sup>th</sup> Jan 2021.</b> |                                                                                                                                                                                                                                                                                                                                                                            |                |                           |
| <b>No.</b>                                                                                                        | <b>Query</b>                                                                                                                                                                                                                                                                                                                                                               | <b>Results</b> | <b>Facet</b>              |
| 1                                                                                                                 | exp migraine/ or exp Migraine Disorders/                                                                                                                                                                                                                                                                                                                                   | 93,456         | <b>Disease facet</b>      |
| 2                                                                                                                 | (migrainous headache or migraine or hemicrania or status hemicranicus or chronic migraine).ti,ab.                                                                                                                                                                                                                                                                          | 88,901         |                           |
| 3                                                                                                                 | #1 OR #2                                                                                                                                                                                                                                                                                                                                                                   | 112,200        |                           |
| 4                                                                                                                 | exp observational study/ or exp Observational Studies as Topic/ or exp Health Care Surveys/ or exp health care survey/ or exp Health Surveys/ or exp health survey/ or exp Electronic Health Records/ or exp electronic health record/ or exp "medical record review"/ or exp pragmatic trial/ or exp Pragmatic Clinical Trial/ or exp Pragmatic Clinical Trials as Topic/ | 8,322,962      | <b>Study design facet</b> |

|   |                                                                                                                                                                                                                                                                                                                                                                                                                                                                                                                                                                                                                                                               |            |  |
|---|---------------------------------------------------------------------------------------------------------------------------------------------------------------------------------------------------------------------------------------------------------------------------------------------------------------------------------------------------------------------------------------------------------------------------------------------------------------------------------------------------------------------------------------------------------------------------------------------------------------------------------------------------------------|------------|--|
|   | or exp real world data/ or exp real world evidence/ or exp clinical practice/ or exp cross-sectional study/ or exp Cross-Sectional Studies/ or exp registries/ or exp register/ or (register or registries).ti,ab. or exp cohort analysis/ or exp Cohort Studies/ or exp longitudinal study/ or exp longitudinal studies/ or exp prospective study/ or exp prospective studies/ or exp follow up/ or exp Follow-Up Studies/ or exp case control study/ or exp Case-Control Studies/ or (case* adj1 control*).ti,ab. or cohort*.ti,ab. or (('follow up' or followup) adj1 (study or studies)).ti,ab. or exp retrospective study/ or exp Retrospective Studies/ |            |  |
| 5 | (observational or 'observational study' or survey or database or 'insurance claim' or 'electronic health record' or 'electronic medical record or 'chart review' or 'cross sectional or 'pragmatic trial or 'real world' or 'real life or 'non-interventional or 'clinical practice').ti,ab.                                                                                                                                                                                                                                                                                                                                                                  | 3,818,272  |  |
| 6 | 4 or 5                                                                                                                                                                                                                                                                                                                                                                                                                                                                                                                                                                                                                                                        | 10,252,176 |  |



|    |                                                                                                                                                                                |           |  |
|----|--------------------------------------------------------------------------------------------------------------------------------------------------------------------------------|-----------|--|
| 7  | editorial/                                                                                                                                                                     | 1,218,489 |  |
| 8  | letter/                                                                                                                                                                        | 2,213,403 |  |
| 9  | note/ or Lecture Note/                                                                                                                                                         | 788,301   |  |
| 10 | 7 or 8 or 9                                                                                                                                                                    | 4,218,384 |  |
| 11 | 6 not 10                                                                                                                                                                       | 9,906,355 |  |
| 12 | 3 and 11                                                                                                                                                                       | 28,163    |  |
| 13 | from 12 keep 1-18682                                                                                                                                                           | 18,682    |  |
| 14 | limit 13 to dd=20200201-20210120 [Limit not valid in Ovid MEDLINE(R),Ovid MEDLINE(R) Daily Update,Ovid MEDLINE(R) In-Process,Ovid MEDLINE(R) Publisher; records were retained] | 738       |  |
| 15 | from 12 keep 18683-28163                                                                                                                                                       | 9,481     |  |
| 16 | limit 15 to ed=20200201-20210120 [Limit not valid in Embase; records were retained]                                                                                            | 595       |  |
|    |                                                                                                                                                                                |           |  |

|                                                                                   |                                                         |              |                      |
|-----------------------------------------------------------------------------------|---------------------------------------------------------|--------------|----------------------|
| 17                                                                                | 14 or 16                                                | 1,333        |                      |
| 18                                                                                | remove duplicates from 17                               | 1,302        |                      |
| 19                                                                                | limit 12 to yr="2020-Current"                           | 2,697        |                      |
| 20                                                                                | 19 not 18                                               | 1,873        |                      |
| 21                                                                                | remove duplicates from 20                               | 1,426        |                      |
| 22                                                                                | from 21 keep 1286-1426                                  | 141          |                      |
| 23                                                                                | 18 or 22                                                | 1,443        |                      |
| 24                                                                                | <b>remove duplicates from 23</b>                        | <b>1,345</b> | <b>Final</b>         |
| <b>Search strategy for Cochrane library conducted on 20<sup>th</sup> Jan 2021</b> |                                                         |              |                      |
| <b>No.</b>                                                                        | Query                                                   | Results      | Facet                |
| 1                                                                                 | MeSH descriptor: [Migraine Disorders] explode all trees | 2,672        | <b>Disease facet</b> |

|   |                                                                                                               |            |                           |
|---|---------------------------------------------------------------------------------------------------------------|------------|---------------------------|
| 2 | ('migraine' OR 'migrainous headache' OR 'hemicrania' OR 'status hemicranicus' OR 'chronic migraine'):ti,ab,kw | 7,519      | <b>Study design facet</b> |
| 3 | #1 OR #2                                                                                                      | 7,519      |                           |
| 4 | (Observational study OR cross sectional OR cohort study OR case control study):ti,ab,kw                       | 93,892     |                           |
| 5 | (prospective study Or retrospective study OR registry OR longitudinal study):ti,ab,kw                         | 227,419    |                           |
| 6 | (survey OR electronic medical record OR chart review OR real world data):ti,ab,kw                             | 36,595     |                           |
| 7 | #4 OR #5 OR #6                                                                                                | 314,258    |                           |
| 8 | #3 AND #7                                                                                                     | 1,047      |                           |
| 9 | #3 AND #7 with Cochrane Library publication date Between Mar 2020 and Jan 2021, in Cochrane Reviews, Trials   | <b>100</b> | <b>Final</b>              |



**Supplementary Table 2. Newcastle–Ottawa Scale for cohort and case–control studies.**

| Study question                                                                                                                                                                                                                                                                                                                | Points |
|-------------------------------------------------------------------------------------------------------------------------------------------------------------------------------------------------------------------------------------------------------------------------------------------------------------------------------|--------|
| <b>Cohort studies</b>                                                                                                                                                                                                                                                                                                         |        |
| <p>Selection</p> <ul style="list-style-type: none"> <li>• Representativeness of the exposed cohort (1 point)</li> <li>• Selection of the non-exposed cohort (1 point)</li> <li>• Ascertainment of exposure (1 point)</li> <li>• Demonstration that outcome of interest was not present at start of study (1 point)</li> </ul> |        |
| <p>Comparability</p> <ul style="list-style-type: none"> <li>• Comparability of cohorts on the basis of the design or analysis (2 points)</li> </ul>                                                                                                                                                                           |        |
| <p>Outcome</p> <ul style="list-style-type: none"> <li>• Assessment of outcome (1 point)</li> <li>• Was follow-up long enough for outcomes to occur? (1 point)</li> <li>• Adequacy of follow-up of cohorts (1 point)</li> </ul>                                                                                                |        |
| <b>Case–control studies</b>                                                                                                                                                                                                                                                                                                   |        |
| <p>Selection</p>                                                                                                                                                                                                                                                                                                              |        |

| Study question                                                                                                                                                                                                                        | Points |
|---------------------------------------------------------------------------------------------------------------------------------------------------------------------------------------------------------------------------------------|--------|
| <ul style="list-style-type: none"> <li>• Adequacy of the case definition (1 point)</li> <li>• Representativeness of cases (1 point)</li> <li>• Selection of controls (1 point)</li> <li>• Definition of controls (1 point)</li> </ul> |        |
| <p>Comparability</p> <ul style="list-style-type: none"> <li>• Comparability of cases and controls (2 points)</li> </ul>                                                                                                               |        |
| <p>Exposure</p> <ul style="list-style-type: none"> <li>• Assessment of exposure (1 point)</li> <li>• Same method of ascertainment for cases and controls (1 point)</li> <li>• Non-response rate (1 point)</li> </ul>                  |        |

Cohort studies were graded from 0 (poorest quality) to 9 (highest quality).

**Supplementary Table 3. Baseline clinical characteristics of patients enrolled in the included studies.**

| Study name                              | Sample size       | Age, years, mean (±SD) | Age of CM onset, years, mean (±SD) | Female, n (%) | CM duration years, mean (±SD) or median* (range: min-max) | Headache days/month, mean (±SD) or median* (range: min-max) | Migraine days/month, mean (±SD) or median* (range: min-max) | Prior treatment status | Prior acute/preventive med use, n (%) | Number of failed meds | Comorbidities, n (%) |
|-----------------------------------------|-------------------|------------------------|------------------------------------|---------------|-----------------------------------------------------------|-------------------------------------------------------------|-------------------------------------------------------------|------------------------|---------------------------------------|-----------------------|----------------------|
| <b>Alpuente 2019</b>                    | 578 <sup>§§</sup> | N/R                    | N/R                                | N/R           | N/R                                                       | 26.9 (4.8)                                                  | N/R                                                         | Unknown                | N/R                                   | N/R                   | N/R                  |
| <b>Ahmed 2015 (Hull migraine study)</b> | 972               | 45.0 (14.0–96.0)*      | M: 17.0                            | 693 (81.4)    | 4.0 (range: 0.5–67.0)                                     | N/R                                                         | N/R                                                         | Previously treated     | 448 (52.6)/N/R                        | ≥3                    | N/R                  |
| <b>Ahmed 2019 (REPOSE)</b>              | 633               | 45.4 (±11.7)           | M: 18.2 (±9.9)                     | 540 (85.3)    | 5.6 (±8.0)                                                | 20.6 (±5.4)                                                 | N/R                                                         | Previously treated     | 534 (84.4)/402 (63.5)                 | N/R                   | N/R                  |
| <b>Alessiani 2018</b>                   | 54                | N/R                    | N/R                                | N/R           | N/R                                                       | ~25.5                                                       | N/R                                                         | Unknown                | ~20.6 <sup>§</sup> /N/R               | N/R                   | N/R                  |
| <b>Andreou 2018</b>                     | 200               | 46.0 (±11.9)           | N/R                                | 158 (79.0)    | 5.9 (±5.0)                                                | 24.0 (18.0-30.0)*                                           | 13.0 (9.0- 19.0)*                                           | Previously treated     | 89 (46.0)/N/R                         | N/R                   | N/R                  |
| <b>Aydinlar 2017</b>                    | 190               | 39.3 (±10.2)           | N/R                                | 167 (87.9)    | 3.0 (range: 1.0–10.0)*                                    | 15.0 (12.0–25.0)*                                           | N/R                                                         | Previously treated     | 190 (100.0) <sup>°</sup>              | N/R                   | N/R                  |
| <b>Belvis 2018</b>                      | 90                | N/R                    | N/R                                | N/R           | N/R                                                       | N/R                                                         | N/R                                                         | Unknown                | N/R                                   | N/R                   | N/R                  |
| <b>Boudreau 2020a,b (PREDICT)</b>       | 184               | 45.0                   | N/R                                | 156 (84.8)    | N/R                                                       | 20.9 (±6.7)                                                 | N/R                                                         | Treatment naïve        | N/R                                   | N/R                   | N/R                  |
| <b>Butera 2016</b>                      | 44                | 50.0 (range:           | N/R                                | 37 (82.2)     | Mean 14.0 (range: 1.0– 32.0)                              | 25.2 (±6.3)                                                 | 19.6 (±9.6)                                                 | Previously treated     | N/R/16 (36.0)                         | N/R                   | N/R                  |

|                        |                     |                                                                                                                                                                                 |                 |            |                 |             |                          |                    |                              |     |                                                                                                                                                                                                          |
|------------------------|---------------------|---------------------------------------------------------------------------------------------------------------------------------------------------------------------------------|-----------------|------------|-----------------|-------------|--------------------------|--------------------|------------------------------|-----|----------------------------------------------------------------------------------------------------------------------------------------------------------------------------------------------------------|
|                        |                     | 22.0–76.0)                                                                                                                                                                      |                 |            |                 |             |                          |                    |                              |     |                                                                                                                                                                                                          |
| <b>Caronna 2018</b>    | 139                 | 47.3 (±11.4)                                                                                                                                                                    | M: 17.3 (±11.1) | 115 (82.7) | 9.3 (±9.0)      | 27.3 (±4.7) | 13.4 (±8.1)              | Previously treated | 139 (100.0)/N/R              | ≥1  | <ul style="list-style-type: none"> <li>•Anxiety: 96 (69.1)</li> <li>•Depression: 62 (44.9)</li> <li>•Fibromyalgia: 24 (17.4)</li> <li>•CFS: 14 (10.1)</li> <li>•Sleeping disorders: 44 (32.4)</li> </ul> |
| <b>Corbelli 2019</b>   | 195                 | <ul style="list-style-type: none"> <li>•R: 47.8 (±14.1)</li> <li>•Partial-R: 46.9 (±11.9)</li> <li>•Non-R: 45.5 (±13.6)</li> <li>•Dropout: 49.4 (±9.7)<sup>***</sup></li> </ul> | N/R             | 160 (82.1) | N/R             | 24.2 (±5.6) | N/R                      | Previously treated | N/R                          | N/R | N/R                                                                                                                                                                                                      |
| <b>d’Onofrio 2020</b>  | 40 <sup>&amp;</sup> | 48.6 (±11.1)                                                                                                                                                                    | N/R             | 23 (76.6)  | 25.7 (±12.3)    | 19.3 (±5.9) | 23.0 (±8.9) <sup>^</sup> | Previously treated | 18.2 (6.3) <sup>§</sup> /N/R | N/R | N/R                                                                                                                                                                                                      |
| <b>de Tommaso 2019</b> | 99                  | 46.1 (±13.7)                                                                                                                                                                    | N/R             | 85 (85.9)  | M: 23.5 (±12.1) | 24.8 (±5.5) | N/R                      | Previously treated | 90 (90.9)/N/R                | N/R | N/R                                                                                                                                                                                                      |
| <b>Dominguez 2018</b>  | 725                 | 46.8 (±12.0)                                                                                                                                                                    | N/R             | 622 (85.8) | 20.4 (±18.7)    | 21.8 (±6.4) | 13.8 (±7.0)              | Previously treated | N/R/398 (54.9)               | N/R | •Depression: 250 (34.5)                                                                                                                                                                                  |



|                                    |     |                 |                                                                                                                                 |               |                    |                           |                           |                       |                                 |     |                       |                                                                   |
|------------------------------------|-----|-----------------|---------------------------------------------------------------------------------------------------------------------------------|---------------|--------------------|---------------------------|---------------------------|-----------------------|---------------------------------|-----|-----------------------|-------------------------------------------------------------------|
|                                    |     |                 |                                                                                                                                 |               |                    |                           |                           |                       |                                 |     |                       | •Fibromyalgia:<br>94 (13.0)<br>•Any <sup>§§</sup> : 231<br>(31.9) |
| <b>Dikmen 2018</b>                 | 180 | 40.4<br>(±10.5) | N/R                                                                                                                             | 159<br>(88.3) | M: 12.0<br>(±9.1)  | 18.9 (±5.5)               | N/R                       | Previously<br>treated | 46 (25.5)/N/R                   | N/R | N/R                   | N/R                                                               |
| <b>Eren 2020</b>                   | 49  | 43.7<br>(±12.9) | N/R                                                                                                                             | 45(92.0)      | M: 23.4<br>(±12.3) | 24.1 (±5.6)               | N/R                       | Treatment<br>naïve    | N/R                             | N/R | N/R                   | N/R                                                               |
| <b>Gandolfi 2019</b>               | 40  | 46.7<br>(±13.7) | • Pre-<br>ado: 11.0<br>(±27.5) <sup>∞</sup><br>• Ado:<br>13.0<br>(±32.5) <sup>∞</sup><br>• Adult:<br>16.0<br>(±40) <sup>∞</sup> | 37 (92.5)     | N/R                | N/R                       | N/R                       | Previously<br>treated | 14 (35)/<br>24 (60.0)           | ≥1  | Any: 24<br>(60.0)     |                                                                   |
| <b>Gonzalez-<br/>Martinez 2020</b> | 112 | 43.0<br>(±11.0) | 43.3<br>(±11.1)                                                                                                                 | 100<br>(89.3) | 2.4 (±3.5)         | N/R                       | N/R                       | Previously<br>treated | 83 (74.1)/N/R                   | N/R | Anxiety: 66<br>(58.9) |                                                                   |
| <b>Garcia-Azorín<br/>2018</b>      | 49  | 43.8            | M: 19.1                                                                                                                         | 45 (91.8)     | 3.2                | N/R                       | N/R                       | Unknown               | N/R                             | N/R | N/R                   |                                                                   |
| <b>Guerzoni 2017</b>               | 90  | 45.2<br>(±10.1) | N/R                                                                                                                             | 76 (84.4)     | N/R                | 1.0 (±0.2) <sup>+++</sup> | N/R                       | Previously<br>treated | N/R/90<br>(100.0)               | ≥3  | N/R                   |                                                                   |
| <b>Grazzi 2016</b>                 | 53  | N/R             | N/R                                                                                                                             | N/R           | N/R                | 19.9 (±13.1)              | N/R                       | Previously<br>treated | 17.4 (5.6)<br><sup>§</sup> /N/R | N/R | N/R                   |                                                                   |
| <b>Grazzi 2015</b>                 | 66  | N/R             | N/R                                                                                                                             | N/R           | N/R                | 21.7 (±6.8) <sup>§§</sup> | 22.4 (±6.5) <sup>§§</sup> | Previously<br>treated | N/R                             | N/R | N/R                   |                                                                   |
| <b>Kennedy 2017</b>                | 120 | N/R             | N/R                                                                                                                             | N/R           | N/R                | N/R                       | N/R                       | Unknown               | N/R                             | N/R | N/R                   |                                                                   |

|                             |                         |                                          |                             |            |                        |                                                                                                   |                                                      |                    |                      |     |                                                                                                                                        |
|-----------------------------|-------------------------|------------------------------------------|-----------------------------|------------|------------------------|---------------------------------------------------------------------------------------------------|------------------------------------------------------|--------------------|----------------------|-----|----------------------------------------------------------------------------------------------------------------------------------------|
| <b>Lee 2016</b>             | 70                      | 48.0<br>(±13.6) <sup>R</sup><br>(n = 42) | N/R                         | 60 (85.7)  | N/R                    | 25.9 (±6.0)                                                                                       | N/R                                                  | Both               | 34 (48.6)/N/R        | N/R | <ul style="list-style-type: none"> <li>•Anxiety: 6 (8.5)</li> <li>•Depression: 10 (14.2)</li> <li>•Any<sup>^</sup>: 4 (5.7)</li> </ul> |
| <b>Lin 2014</b>             | 94                      | 47.6<br>(±13.6)                          | N/R                         | 79 (84.0)  | 8.1 (±8.3)             | 23.9 (±8.1)                                                                                       | N/R                                                  | Previously treated | 18 (19.1)/94 (100.0) | ≥2  | N/R                                                                                                                                    |
| <b>Navarrete Perez 2017</b> | 117                     | 41.0<br>(±11.7)                          | N/R                         | 102 (87.2) | N/R                    | N/R                                                                                               | N/R                                                  | Unknown            | N/R                  | N/R | N/R                                                                                                                                    |
| <b>Negro 2016</b>           | 143<br>(onabotA 195 IU) | 44.9<br>(±12.7)                          | N/R                         | 114 (79.7) | 9.3 (±5.1)             | 22.2 (±4.9)                                                                                       | 21.6 (±4.8)                                          | Previously treated | 143 (100.0)          | N/R | N/R                                                                                                                                    |
|                             | 132<br>(onabotA 155 IU) | 43.2<br>(±13.5)                          | N/R                         | 108 (81.8) | 10.2 (±4.8)            | 22.3 (±4.1)                                                                                       | 21.4 (±4.3)                                          | Previously treated | 132 (100.0)          | N/R | N/R                                                                                                                                    |
| <b>Ornello 2020</b>         | 115                     | 50 (44.5–54.0)*                          | N/R                         | 97 (84.3)  | 5.2 (range: 2.0–12.0)* | Non-R: 30 (range: 30–30)*<br>Anytime R: 30 (range: 24–30)*<br>Sustained-R: 25 (range: 21.5–30.0)* | N/R                                                  | Previously treated | 89 (77.4)/N/R        | N/R | Hypertension: 29 (25.2)                                                                                                                |
| <b>Pedraza 2015</b>         | 52                      | 42.8<br>(±12.7)                          | M: 16.8 (7.8)               | 44 (84.6)  | N/R                    | 23.4 (±6.3)                                                                                       | 13.9 (±7.3)                                          | Previously treated | 43 (82.7)/52 (100.0) | N/R | N/R                                                                                                                                    |
| <b>Quintas 2019</b>         | 193                     | 41.4<br>(±11.06)                         | 18.09 (±9.4) <sup>+</sup> ; | 168 (87.0) | 3.6 (±4.9)             | 22.3 (±6.1)                                                                                       | 11.5 (±7.2) <sup>+</sup> ; 11.5 (±6.5) <sup>++</sup> | Treatment naïve    | 132 (68.4)/N/R       | N/R | N/R                                                                                                                                    |

|                               |                     |                                     |                  |               |                 |                                                               |                 |                       |                             |     |                                                    |
|-------------------------------|---------------------|-------------------------------------|------------------|---------------|-----------------|---------------------------------------------------------------|-----------------|-----------------------|-----------------------------|-----|----------------------------------------------------|
|                               |                     | +; 42.02<br>(±11.5)**               | 18.6<br>(±9.3)** |               |                 |                                                               |                 |                       |                             |     |                                                    |
| <b>Romoli 2017</b>            | 56                  | 45.7                                | N/R              | 45 (79.7)     | N/R             | 23.3 (±5.7) at<br>cycle 1                                     | 18.5 at cycle 1 | Both                  | 40 (71.4)/N/R<br>at cycle 1 | N/R | N/R                                                |
| <b>Russo 2016</b>             | 52                  | 48.7<br>(±12.9)                     | 38.2<br>(12.1)   | 46 (88.5)     | 9.9 (±7.6)      | N/R                                                           | N/R             | Previously<br>treated | 46 (88.5)/N/R               | N/R | N/R                                                |
| <b>Santoro 2020</b>           | 109                 | 48.1<br>(±13.5)                     | N/R              | 82 (75.2)     | 11.7 (±9.8)     | 25.5 (±5.8)                                                   | N/R             | Previously<br>treated | N/R/47<br>(43.1)            | N/R | N/R                                                |
| <b>Stark 2019</b>             | 211                 | 44.6<br>(±12.5)                     | N/R              | 187<br>(88.6) | 14.5<br>(±12.3) | 25.2 (±5.3)                                                   | 15.3 (±7.9)     | Previously<br>treated | 129 (61.1)/<br>N/R          | N/R | •Anxiety: 17<br>(8.0)<br>•Depression: 23<br>(11.0) |
| <b>Sanz 2018</b>              | 69                  | 43.2<br>(±15.2)                     | N/R              | 61 (88.4)     | N/R             | 20.6 (±8.5)                                                   | N/R             | Both                  | N/R/57 (82.6)               | ≥3  | Anxiety: 14<br>(20.3)                              |
| <b>Sarchielli<br/>2017</b>    | 56                  | 45.7<br>(±6.5)                      | N/R              | 47 (83.9)     | 7.9 (±4.3)      | 23.1 (±6.3)                                                   | 18.9 (±5.6)     | Previously<br>treated | 2.6 (0.5) <sup>§</sup>      | ≥2  | N/R                                                |
| <b>Torres-Ferrus<br/>2020</b> | 395                 | 46.7<br>(±12.6)                     | N/R              | 336<br>(85.1) | 10.5 (±9.9)     | 26.5 (±5.2)                                                   | N/R             | Treatment<br>naïve    | 378<br>(95.7)/N/R           | N/R | N/R                                                |
| <b>Taddei-Allen<br/>2019</b>  | 21<br>(CGRP)        | 47.0                                | N/R              | 15 (71.0)     | N/R             | N/R                                                           | N/R             | Unknown               | N/R                         | N/R | N/R                                                |
|                               | 21<br>(onabo<br>tA) | 47.0                                | N/R              | 19 (90.0)     | N/R             | N/R                                                           | N/R             | Unknown               | N/R                         | N/R | N/R                                                |
| <b>Vernieri 2019</b>          | 115                 | Roma<br>center:<br>51.6<br>(±10.3); | N/R              | 95 (82.6)     | N/R             | Roma center,<br>21.2 (±6.7);<br>Milano center:<br>20.2 (±6.2) | N/R             | Previously<br>treated | 115<br>(100.0)/N/R          | ≥2  | N/R                                                |

|                            |    |                                  |                 |           |     |              |     |                    |                            |    |     |
|----------------------------|----|----------------------------------|-----------------|-----------|-----|--------------|-----|--------------------|----------------------------|----|-----|
|                            |    | Milano center:<br>51.0<br>(±8.2) |                 |           |     |              |     |                    |                            |    |     |
| <b>Velasco-Juanes 2018</b> | 70 | 48.9<br>(±12.4)                  | 38.8<br>(±14.0) | 61 (87.1) | N/R | 25.8 (±14.6) | N/R | Previously treated | 39 (55.7)/<br>70.0 (100.0) | ≥3 | N/R |

CGRP: calcitonin gene-related peptide; CFS: chronic fatigue syndrome; CM: chronic migraine; IU: international units; M: chronic or episodic migraine not specified; N/R: not reported; onabotA: onabotulinumtoxinA; R: responders; SD: standard deviation; VAS: visual analog scale.

Note: ^Mean (SD) days with headache/migraine per 30-day period; \*Median (range); °Both preventive and acute medications; \$Mean (SD) of acute medication used; \$SData available only for group of 20 patients who completed the treatment; ^^Hypo- and hyperthyroidism: +Wearing off responders; ++Full-length responder; +++Headache index after one onabotulinumtoxinA injection; §Migraine pain severity; ∞Values are N (%); §§Includes hypertension, heart disease, gastrointestinal disease, lung disease, and skin disturbances; &Patients characteristics were reported only for 30 patients; <sup>R</sup>Responders; <sup>'''</sup>Patients' age at the end phase 1; &In most studies, headache severity was assessed using a numeric scale or VAS or pain intensity score.

<sup>1</sup>Corresponds to headache days/month at baseline; <sup>2</sup>The number of episodes of moderate–severe acute headache longer than 4 hours (or shorter if treated with symptomatic medications).

**Supplementary Table 4. Baseline HRQoL and disability level of patients enrolled in the included studies which measured the outcomes.**

| Study name     | Baseline HIT-6 score            | Baseline MSQ domain or total score                                                                                                      | Baseline MIDAS score |
|----------------|---------------------------------|-----------------------------------------------------------------------------------------------------------------------------------------|----------------------|
|                | Mean ( $\pm$ SD) [SE] or median |                                                                                                                                         |                      |
| Ahmed 2015a    | 68.9 ( $\pm$ 4.3)               | N/R                                                                                                                                     | N/R                  |
| Ahmed 2019     | N/R                             | Role-function restrictive: 36.2 ( $\pm$ 17.8)<br>Role-function preventive: 50.2 ( $\pm$ 22.8)<br>Emotional function: 42.4 ( $\pm$ 25.6) | N/R                  |
| Alpuente 2019a | N/R                             | N/R                                                                                                                                     | 86.4 ( $\pm$ 71.3)   |
| Andreou 2018   | 70.0 (65.0-72.0)                | N/R                                                                                                                                     | N/R                  |
| Aydinlar 2017  | N/R                             | N/R                                                                                                                                     | 57 [N=89] ^          |
| Barbanti 2020b | N/R                             | N/R                                                                                                                                     | N/R                  |
| Barbanti 2019a | 69.2 ( $\pm$ 6.8)               | N/R                                                                                                                                     | N/R                  |

|                        |               |                                                                                                                       |                                                                 |
|------------------------|---------------|-----------------------------------------------------------------------------------------------------------------------|-----------------------------------------------------------------|
| <b>Boudreau 2018</b>   | N/R           | Role-function restrictive 36.7 (SD N/R)<br>Role-function preventive 51.4 (SD N/R)<br>Emotional function 38.0 (SD N/R) | N/R                                                             |
| <b>Butera 2016</b>     | 65.6 (±8.2)   | N/R                                                                                                                   | 117.3 (±94.8)                                                   |
| <b>Caronna 2018a</b>   | N/R           | N/R                                                                                                                   | 80.4 (±67.5)                                                    |
| <b>de Tommaso 2019</b> | N/R           | N/R                                                                                                                   | 63.4 (±61.8)                                                    |
| <b>Dominguez 2018a</b> | N/R           | N/R                                                                                                                   | 35.9 (±29.6)                                                    |
| <b>d'Onofrio 2020</b>  | 62.9 (±11.1)  | N/R                                                                                                                   | 55.3 (±26.1)                                                    |
| <b>Gandolfi 2019</b>   | 61.62 (±8.42) | N/R                                                                                                                   | Total: 65.67 (±61.12)<br>HF: 39.37 (±24.91)<br>PI: 6.37 (±1.61) |
| <b>Guerzoni 2017</b>   | 65.1 (±6.2)   | N/R                                                                                                                   | N/R                                                             |
| <b>Grazzi 2015</b>     | 65.4 (±7.5)   | N/R                                                                                                                   | 79.8 (±57.9)                                                    |
| <b>Jenkins 2019</b>    | 66            | N/R                                                                                                                   | N/R                                                             |

|                       |                                 |     |                                 |
|-----------------------|---------------------------------|-----|---------------------------------|
| <b>Kennedy 2017</b>   | N/R                             | N/R | N/R                             |
| <b>Lambru 2020</b>    | ERE: 67.6 ( $\pm 0.4$ )         | N/R | N/R                             |
|                       | ERE-MOH: 66.7 ( $\pm 1$ )       | N/R | N/R                             |
|                       | ERE-nMOH: 66.7 ( $\pm 1$ )      | N/R | N/R                             |
| <b>Lambru 2016</b>    | 69.1                            | N/R | N/R                             |
| <b>Lee 2016</b>       | 68.2 ( $\pm 5.7$ )              | N/R | N/R                             |
| <b>Lin 2014</b>       | N/R                             | N/R | 60 <sup>^</sup>                 |
| <b>Naprienko 2020</b> | OBT-A: 61.2 (SD N/R)            | N/R | N/R                             |
|                       | TPM: 62.0 (SD N/R)              | N/R | N/R                             |
| <b>Negro 2016</b>     | OBT-A 155 U: 68.9 ( $\pm 4.3$ ) | N/R | N/R                             |
|                       | OBT-A 195 U: 67.9 ( $\pm 4.2$ ) | N/R | N/R                             |
| <b>Ornello 2020a</b>  | 65.0 (60-69)                    | N/R | 87.5 (42.5- 123.5) <sup>^</sup> |
| <b>Russo 2016</b>     | N/R                             | N/R | 71.7 ( $\pm 43.4$ )             |
| <b>Russo 2020</b>     | N/R                             | N/R | 108.1 [ $\pm 11.2$ ]            |

|                            |                     |                                              |                                       |
|----------------------------|---------------------|----------------------------------------------|---------------------------------------|
| <b>Stark 2019</b>          | 68.2 (SD or SE N/R) | All domains (total score): 62.7 [ $\pm$ 7.5] | N/R                                   |
| <b>Sarchielli 2017</b>     | 72.1 ( $\pm$ 6.0)   | N/R                                          | N/R                                   |
| <b>Talbot 2021</b>         | 66.9 ( $\pm$ 9.4)   | N/R                                          | N/R                                   |
| <b>Velasco-Juanes 2018</b> | 69.2 ( $\pm$ 6.1)   | N/R                                          | N/R                                   |
| <b>Vernieri 2019</b>       | N/R                 | N/R                                          | 72.0 <sup>^</sup> (interquartile N/R) |
| <b>Yalinay Dikmen 2018</b> | N/R                 | N/R                                          | 53.3 ( $\pm$ 26.6)                    |
| <b>Zyloney 2020</b>        | N/R                 | N/R                                          | 62 (SD N/R)                           |

CI: confidence interval; CM: chronic migraine; ERE: erenumab; GAL: galcanezumab; HIT: headache impact test; MOH: medication overuse; nMOH: non-medication overuse; MIDAS: Migraine Disability Assessment; MSQ: Migraine-Specific Quality of Life; N/R: not reported; OBT-A: onabotulinumtoxinA; SD: standard deviation; SE: standard error; TPM: topiramate.

<sup>^</sup>Median (inter-quartile) values



**Supplementary Table 5. Treatment characteristics and designs of the included studies.**

| Study name     | Sample size | OnabotA dose (IU)        | Frequency (weeks)                                               | Protocol                                                                | Duration (months) [N of cycles] |
|----------------|-------------|--------------------------|-----------------------------------------------------------------|-------------------------------------------------------------------------|---------------------------------|
| Ahmed 2015     | 972         | 155                      | N/R                                                             | PREEMPT                                                                 | N/R [5,745]                     |
| Ahmed 2019     | 633         | 155–195 <sup>&amp;</sup> | Every 12                                                        | FTP                                                                     | N/R                             |
| Alpuente 2019  | N/R         | N/R                      | Quarterly                                                       | PREEMPT                                                                 | 24                              |
| Alessiani 2018 | 54          | N/R                      | N/R                                                             | PREEMPT                                                                 | N/R                             |
| Andreou 2018   | 97          | 155                      | N/R                                                             | FSFD                                                                    | N/R                             |
|                | 103         | 177 <sup>++</sup>        | N/R                                                             | FTP                                                                     | N/R                             |
| Aydinlar 2017  | 190         | N/R                      | Every 12                                                        | <ul style="list-style-type: none"> <li>• FSFD</li> <li>• FTP</li> </ul> | ≥6 [2]                          |
| Belvis 2018    | 90          | N/R                      | N/R                                                             | PREEMPT                                                                 | N/R                             |
| Boudreau 2020  | 184         | 171 (18) <sup>§</sup>    | 13.2 (1.8) <sup>§</sup>                                         | Canadian product monograph                                              | 24 [7]                          |
| Butera 2016    | 44          | N/R                      | Every 12                                                        | PREEMPT                                                                 | N/R                             |
| Corbelli 2019  | 195         | 155–195                  | Every 12                                                        | N/R                                                                     | 12 [4]                          |
| Caronna 2018   | 139         | 155                      | <ul style="list-style-type: none"> <li>• At baseline</li> </ul> | PREEMPT                                                                 | N/R [2]                         |

| Study name                    | Sample size | OnabotA dose (IU) | Frequency (weeks)                                                                                                                 | Protocol                    | Duration (months) [N of cycles] |
|-------------------------------|-------------|-------------------|-----------------------------------------------------------------------------------------------------------------------------------|-----------------------------|---------------------------------|
|                               |             |                   | <ul style="list-style-type: none"> <li>• At 12</li> </ul>                                                                         |                             |                                 |
| <b>d'Onofrio 2020</b>         | 40          | 155               | <ul style="list-style-type: none"> <li>• At baseline</li> <li>• At 12</li> <li>• At 24</li> </ul>                                 | PREEMPT                     | N/R [3]                         |
| <b>de Tommaso 2019</b>        | 99          | 155–195           | <ul style="list-style-type: none"> <li>• Every 12 (1<sup>st</sup> year</li> <li>• Every 12 or 16 (2<sup>nd</sup> year)</li> </ul> | In 31–39 peri-cranial sites | 24                              |
| <b>Dikmen 2018</b>            | 180         | 155               | Quarterly (1 <sup>st</sup> year) (all patients received $\geq 1$ dose)                                                            | PREEMPT                     | N/R [ $\geq 1$ ]                |
| <b>Dominguez 2018</b>         | 725         | N/R               | Every 12                                                                                                                          | PREEMPT                     | 12 [4]                          |
| <b>Eren 2020</b>              | 49          | 155               | N/R                                                                                                                               | PREEMPT                     | N/R                             |
| <b>Gandolfi 2019</b>          | 40          | N/R               | N/R                                                                                                                               | PREEMPT                     | N/R [3]                         |
| <b>Garcia-Azorín 2018</b>     | 49          | N/R               | N/R                                                                                                                               | Spanish national guidelines | N/R                             |
| <b>Gonzalez-Martinez 2020</b> | 112         | 155–195           | Every 12 or 15                                                                                                                    | N/R                         | N/R [ $\geq 2$ ]                |

| Study name           | Sample size | OnabotA dose (IU) | Frequency (weeks) | Protocol                                                                | Duration (months) [N of cycles] |
|----------------------|-------------|-------------------|-------------------|-------------------------------------------------------------------------|---------------------------------|
| Grazzi 2016          | 53          | 155               | Every 12          | PREEMPT                                                                 | 12                              |
| Grazzi 2015          | 66          | 155 (5 IU/site)   | Every 12          | In 31 sites                                                             | 12 [5]                          |
| Guerzoni 2017        | 90          | 155               | Every 12          | PREEMPT                                                                 | N/R                             |
| Kennedy 2017         | 120         | N/R               | N/R               | PREEMPT                                                                 | N/R [5]                         |
| Lee 2016             | 70          | N/R               | Every 12          | PREEMPT                                                                 | N/R                             |
| Lin 2014             | 94          | 75 or 100         | N/R               | In 21 sites                                                             | June 2008–July 2010             |
|                      |             | 155               | N/R               | PREEMPT                                                                 | From August 2010                |
| Navarrete Perez 2017 | 117         | N/R               | N/R               | N/R                                                                     | N/R [2]                         |
| Negro 2016           | 143         | 195               | N/R               | PREEMPT                                                                 | N/R                             |
|                      | 132         | 155               | N/R               | PREEMPT                                                                 | N/R                             |
| Ornello 2020         | 115         | 155 ( $\pm$ 40)   | Every 12          | <ul style="list-style-type: none"> <li>• FSFD</li> <li>• FTP</li> </ul> | 15 [5]                          |
| Pedraza 2015         | 52          | N/R               | N/R               | PREEMPT (no additional injections in the first two sessions)            | N/R                             |

| Study name      | Sample size      | OnabotA dose (IU) | Frequency (weeks)      | Protocol                                                                                                                                            | Duration (months) [N of cycles]       |
|-----------------|------------------|-------------------|------------------------|-----------------------------------------------------------------------------------------------------------------------------------------------------|---------------------------------------|
| Quintas 2019    | 193              | 155               | N/R                    | PREEMPT                                                                                                                                             | N/R                                   |
|                 | 31 <sup>oo</sup> | 195               | N/R                    | FTP                                                                                                                                                 | N/R                                   |
| Romoli 2017     | 56               | N/R               | N/R                    | N/R                                                                                                                                                 | Non-responders to cycle 1:<br>N/R [5] |
| Russo 2016      | 52               | N/R               | Every 12               | PREEMPT                                                                                                                                             | N/R                                   |
| Santoro 2020    | 109              | 155–195           | Every 12 ( $\pm$ 10 d) | PREEMPT (CM patients received detoxification with betamethasone for 6 d, and after 15 d patients were advised to take a max of 2 IU/week of NSAIDs) | N/R                                   |
| Sanz 2018       | 69               | 155               | Every 12 or 24         | PREEMPT                                                                                                                                             | 16                                    |
| Sarchielli 2017 | 56               | 195 <sup>o</sup>  | Every 12 ( $\pm$ 1)    | PREEMPT (7 specific head/neck muscle areas)                                                                                                         | N/R [5]                               |
| Stark 2019      | 211              | 155 ( $\pm$ 40)   | N/R                    | • FSFD (31 sites)                                                                                                                                   | N/R [4 (2–11)]*                       |

| Study name          | Sample size | OnabotA dose (IU) | Frequency (weeks) | Protocol                                                                                                                                                          | Duration (months) [N of cycles] |
|---------------------|-------------|-------------------|-------------------|-------------------------------------------------------------------------------------------------------------------------------------------------------------------|---------------------------------|
|                     |             |                   |                   | • FTP                                                                                                                                                             |                                 |
| Taddei-Allen 2019   | 21          | N/R               | N/R               | N/R                                                                                                                                                               | N/R                             |
|                     | 21          | N/R               | N/R               | N/R                                                                                                                                                               | N/R                             |
| Torres-Ferrus 2020  | 395         | N/R               | N/R               | PREEMPT                                                                                                                                                           | N/R [2]                         |
| Velasco-Juanes 2018 | 70          | 70–155            | N/R               | <ul style="list-style-type: none"> <li>• PREEMPT</li> <li>• Posterior cervical</li> <li>• Bilaterally into the frontal, glabellar, and temporal muscle</li> </ul> | N/R                             |
| Vernieri 2019       | 115         | N/R               | Every 12          | PREEMPT                                                                                                                                                           | [≥4]                            |

CM: chronic migraine; CGRP: calcitonin gene-related peptide; d: days; FTP: follow the pain; FSFD: fixed sites fixed dose; max: maximum; N: number; N/R: not reported; NSAID: non-steroidal anti-inflammatory drug; PREEMPT: Phase 3 Research Evaluating Migraine Prophylaxis Therapy; IU: international units.

§Mean (standard deviation); \*Median (range); ^Erenumab, galcanezumab, fremanezumab; ++Average dose; °°Out of 193, 31 (68.9%) patients received 195 U at the second procedure; &OnabotulinumtoxinA 155 U, with discretion to administer an additional 40 U over 8 injection sites according to the follow-the-pain strategy to a maximum total dose of 195 U; “Total dose administered was 195.

**Supplementary Figure 1. Distribution of studies by country (N = 44).**

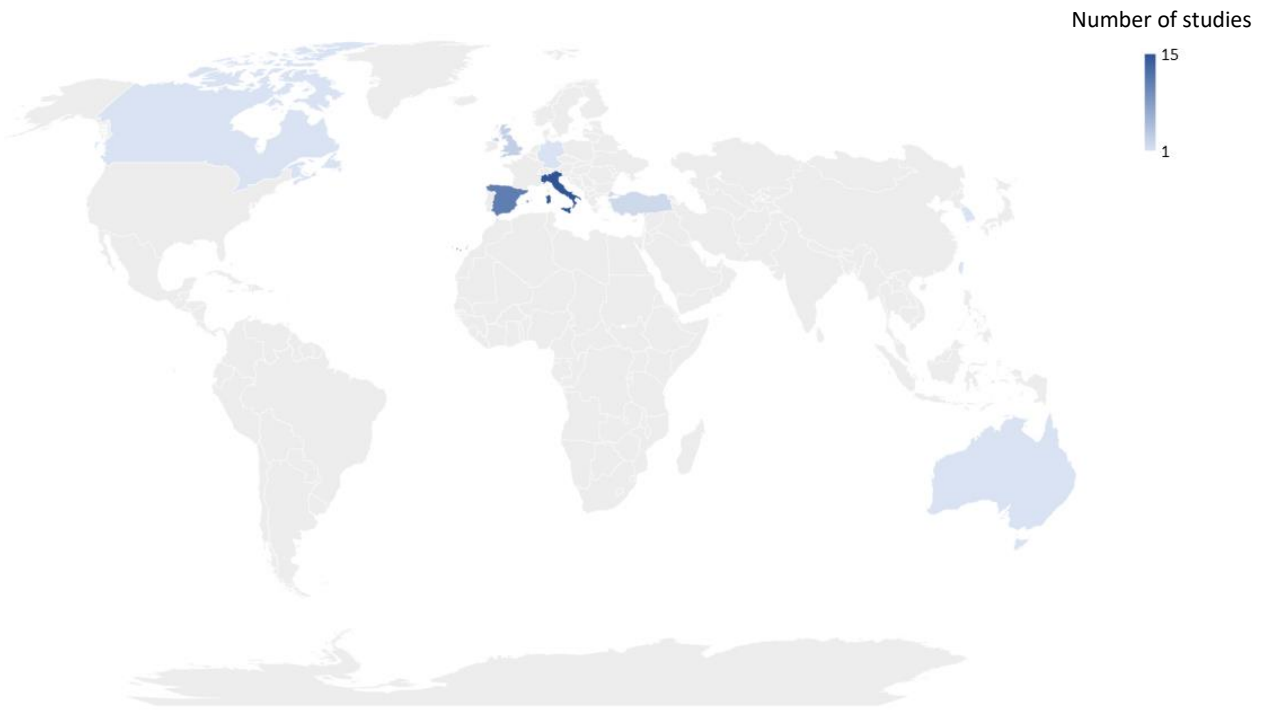

Supplement: sj-pdf-1-cep-10.1177_03331024221123058.pdf [file sj-pdf-1-cep-10.1177_03331024221123058.pdf]
